# Supplementary material
Source: PubMed Central journal article supplement (PMC7959910)
Supplement: 16-00785.pdf [file 16-00785.pdf]

**On-line Table: Volumetric and corticospinal tract diffusion metrics in the entire cohort and in subgroups of patients stratified on the basis of 3-month motor outcome<sup>a</sup>**

|                                       | Entire Cohort (N = 17) | FM-UE ≤9 (n = 3) | FM-UE 10–18 (n = 5) | FM-UE >18 (n = 9) |
|---------------------------------------|------------------------|------------------|---------------------|-------------------|
| Infarct volume <sup>b</sup>           | 43.7 (62.5)            | 139.1 (86.9)     | 34.8 (43.6)         | 16.9 (26.7)       |
| CST volume <sup>b</sup>               | 4.1 (3.0)              | 6.3 (4.4)        | 3.0 (2.2)           | 3.4 (2.9)         |
| Intersection infarct-CST <sup>b</sup> | 1.1 (1.5)              | 3.4 (2.5)        | 0.9 (1)             | 0.4 (0.2)         |
| MD                                    |                        |                  |                     |                   |
| Lesioned CST                          | 0.91 (0.07)            | 0.79 (0.06)      | 0.92 (0.05)         | 0.94 (0.02)       |
| Ratio <sup>c</sup>                    | 0.95 (0.06)            | 0.84 (0.07)      | 0.95 (0.03)         | 0.98 (0.03)       |
| Axial diffusivity                     |                        |                  |                     |                   |
| Lesioned CST                          | 1.35 (0.12)            | 1.15 (0.11)      | 1.37 (0.11)         | 1.40 (0.07)       |
| Ratio                                 | 0.93 (0.07)            | 0.81 (0.07)      | 0.94 (0.04)         | 0.97 (0.04)       |
| Radial diffusivity                    |                        |                  |                     |                   |
| Lesioned CST                          | 0.70 (0.05)            | 0.61 (0.04)      | 0.70 (0.02)         | 0.72 (0.03)       |
| Ratio                                 | 0.96 (0.07)            | 0.87 (0.08)      | 0.97 (0.02)         | 0.99 (0.06)       |
| FA                                    |                        |                  |                     |                   |
| Lesioned CST                          | 0.41 (0.03)            | 0.39 (0.03)      | 0.42 (0.03)         | 0.41 (0.04)       |
| Ratio                                 | 0.96 (0.07)            | 0.90 (0.05)      | 0.96 (0.04)         | 0.98 (0.08)       |
| MK                                    |                        |                  |                     |                   |
| Lesioned CST                          | 1.19 (0.12)            | 1.32 (0.06)      | 1.22 (0.10)         | 1.13 (0.10)       |
| Ratio                                 | 1.08 (0.10)            | 1.24 (0.12)      | 1.09 (0.03)         | 1.03 (0.06)       |
| Axial kurtosis                        |                        |                  |                     |                   |
| Lesioned CST                          | 0.94 (0.11)            | 1.15 (0.08)      | 0.94 (0.05)         | 0.88 (0.05)       |
| Ratio                                 | 1.12 (0.13)            | 1.36 (0.09)      | 1.11 (0.04)         | 1.05 (0.06)       |
| Radial kurtosis                       |                        |                  |                     |                   |
| Lesioned CST                          | 1.48 (0.18)            | 1.53 (0.15)      | 1.57 (0.21)         | 1.42 (0.18)       |
| Ratio                                 | 1.04 (0.10)            | 1.13 (0.16)      | 1.07 (0.06)         | 0.99 (0.08)       |
| AWF                                   |                        |                  |                     |                   |
| Lesioned CST                          | 0.41 (0.02)            | 0.42 (0.01)      | 0.42 (0.02)         | 0.39 (0.02)       |
| Ratio                                 | 1.02 (0.05)            | 1.06 (0.06)      | 1.04 (0.02)         | 0.99 (0.03)       |
| Intra-axonal diffusivity              |                        |                  |                     |                   |
| Lesioned CST                          | 0.71 (0.09)            | 0.59 (0.08)      | 0.73 (0.07)         | 0.73 (0.07)       |
| Ratio                                 | 0.91 (0.09)            | 0.77 (0.07)      | 0.95 (0.05)         | 0.93 (0.06)       |
| Axial extra-axonal diffusivity        |                        |                  |                     |                   |
| Lesioned CST                          | 1.95 (0.17)            | 1.71 (0.14)      | 2.00 (0.20)         | 2.00 (0.11)       |
| Ratio                                 | 0.95 (0.06)            | 0.86 (0.05)      | 0.95 (0.04)         | 0.97 (0.04)       |
| Radial extra-axonal diffusivity       |                        |                  |                     |                   |
| Lesioned CST                          | 1.07 (0.07)            | 0.95 (0.06)      | 1.10 (0.66)         | 1.09 (0.03)       |
| Ratio                                 | 0.97 (0.05)            | 0.89 (0.04)      | 0.98 (0.03)         | 0.99 (0.05)       |

**Note:**—AWF indicates axial water fraction.

<sup>a</sup>All values in this table represent mean (SD).

<sup>b</sup>In milliliters.

<sup>c</sup>Lesioned hemisphere/contralateral hemisphere CST.
